# Supplementary material
Source: MDPI journal article supplement (https://www.mdpi.com/2073-8994/16/5/624)
Supplement: s1 [file s1]

## Supporting information

### **An effective method for the evaluation of the enantiomeric purity of 1,2-diacyl-*sn*-glycero-3-phosphocholine lipids by NMR analysis**

Antonia Di Mola,<sup>a</sup> Lorenzo de Ferra,<sup>b</sup> Mauro Anibaldi,<sup>b</sup> Guglielmo Monaco<sup>a</sup> and Antonio Massa<sup>\*,a</sup>

<sup>a</sup>Dipartimento Di Chimica e Biologia “A. Zambelli”, Università degli studi di Salerno, Via Giovanni Paolo II 132, 84084-Fisciano (SA), Italy

<sup>b</sup>Chemi SpA, Via Vadisi 5, 03010-Patrica (FR), Italy

\*Corresponding author: amassa@unisa.it

$^1\text{H}$  NMR spectrum (400 MHz) of (*R*)-(2-(((1-phenylethyl)amino)methyl)phenyl)boronic acid in  $\text{MeOD-d}_4$ .

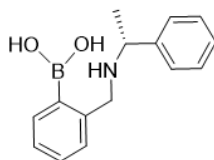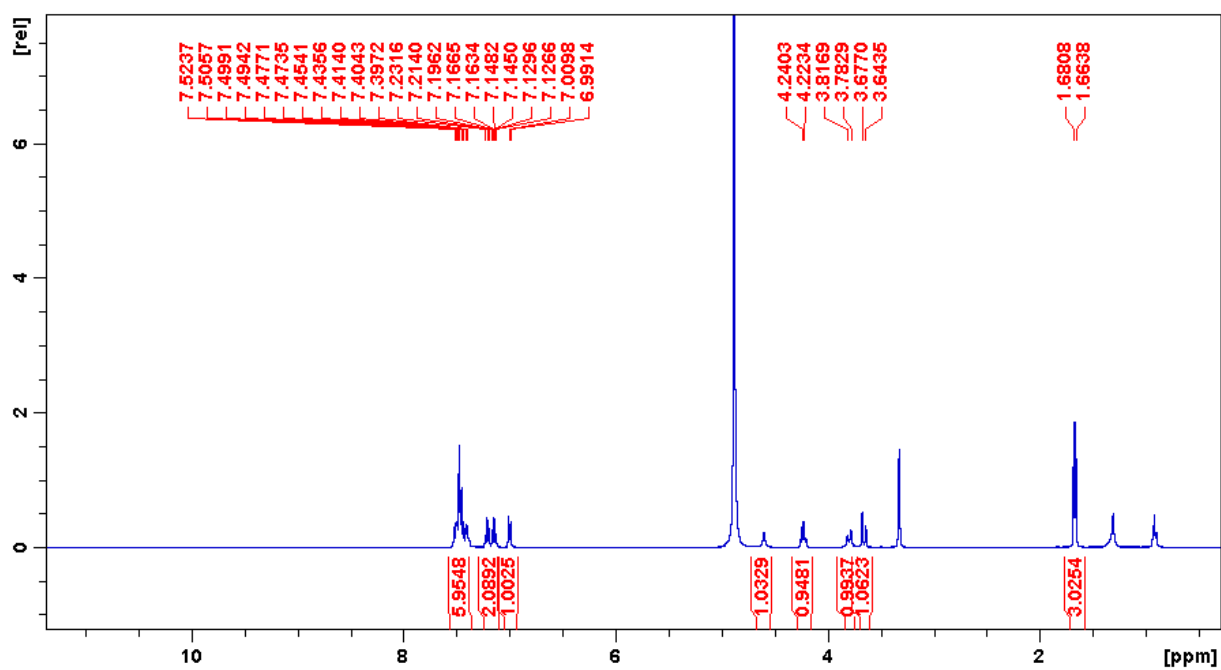

$^1\text{H}$  NMR spectrum (400 MHz) of 1,2-dipalmitoyl-*sn*-glycero-3-phosphocholine (DPPC) in  $\text{CDCl}_3$ .

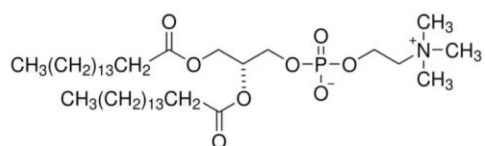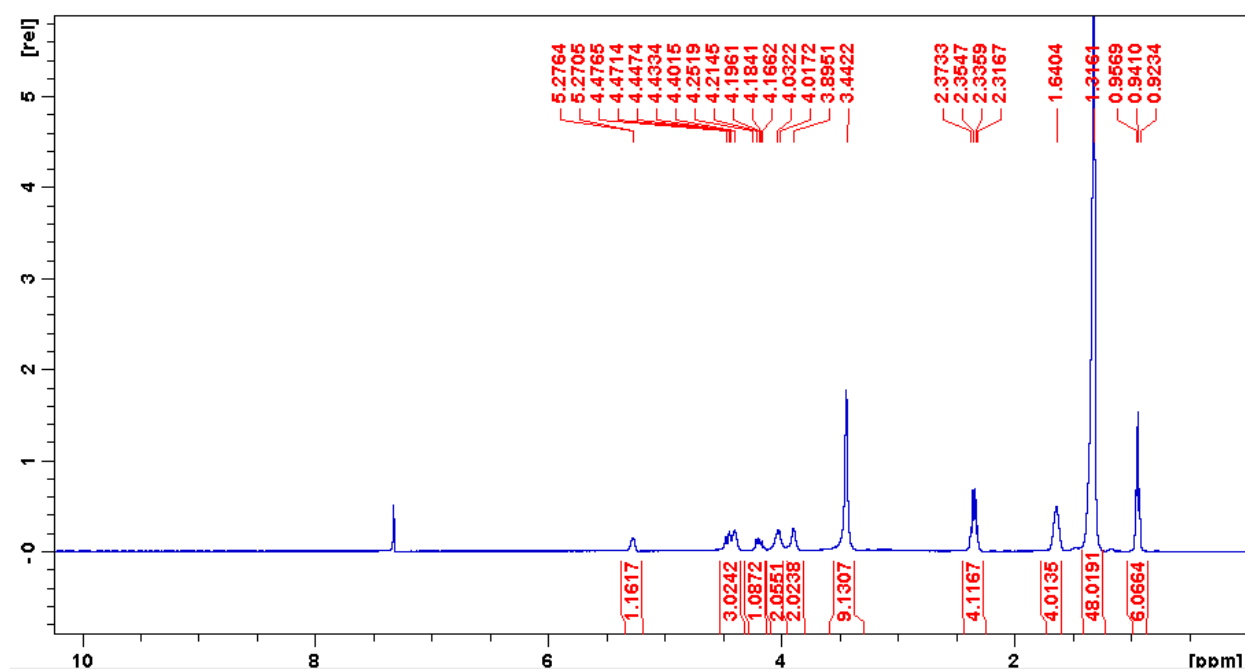

$^1\text{H}$  NMR spectrum in  $\text{CDCl}_3$  (400 MHz) of recovered palmitoyl methyl ester after evaporation of  $\text{CHCl}_3$  solution.

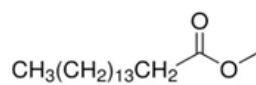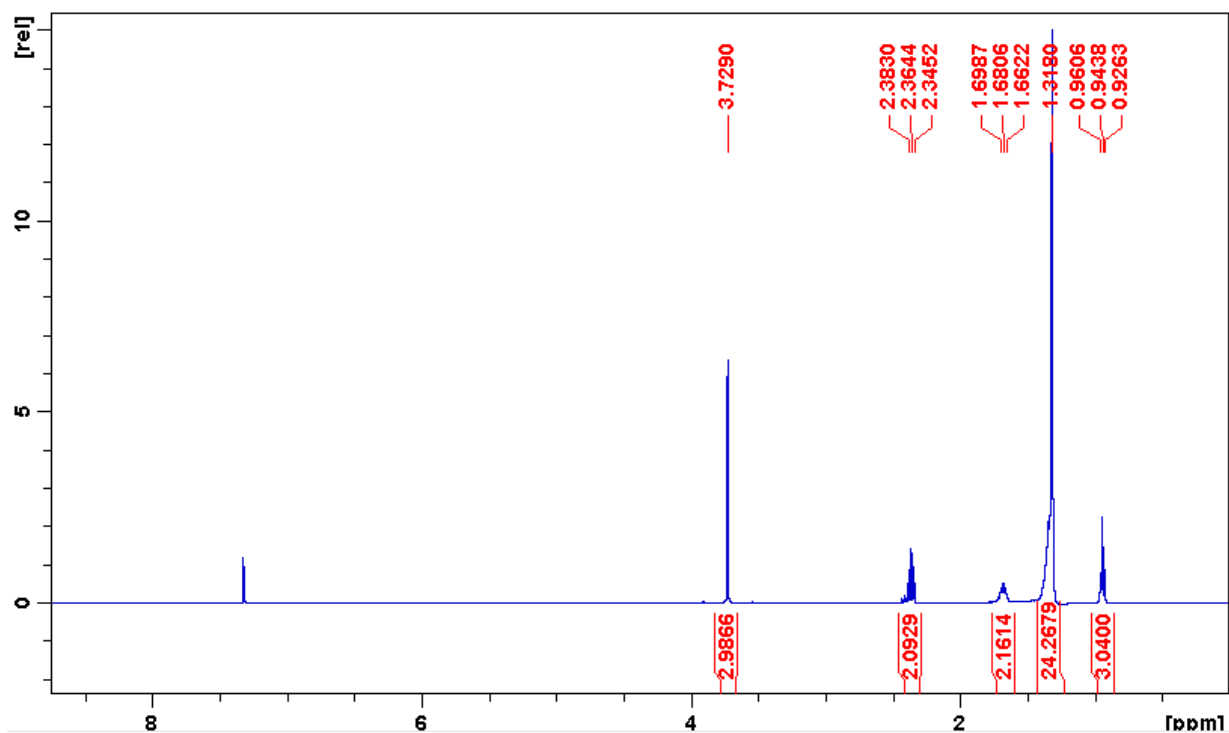

$^1\text{H}$  NMR spectrum in  $\text{D}_2\text{O}$  (400 MHz) of isolated *sn*-glycero-3-phosphocholine after  $\text{CHCl}_3$  washing.

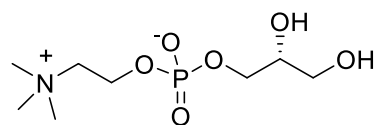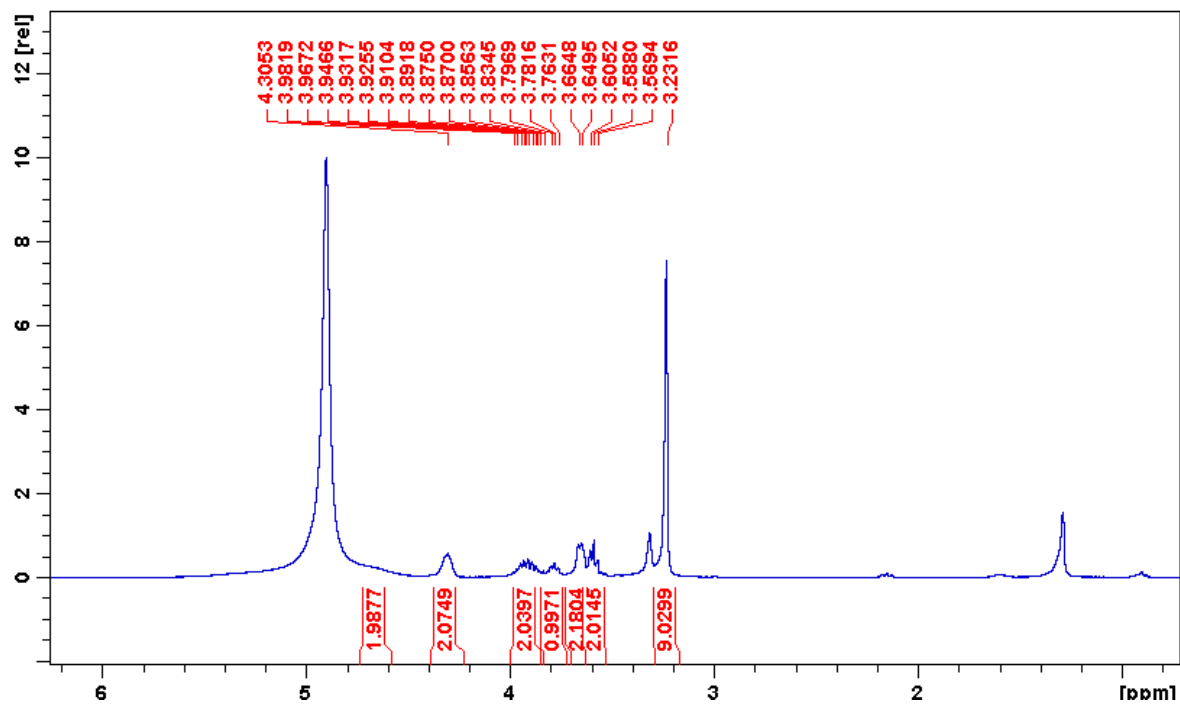

$^1\text{H}$  NMR spectrum (400 MHz) of GPC-CDA reaction starting from the DPPC at 90/10 e.r in  $\text{DMSO-d}_6$ .

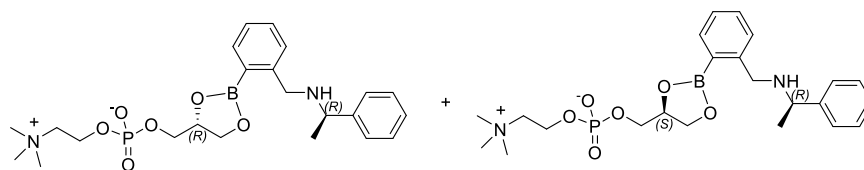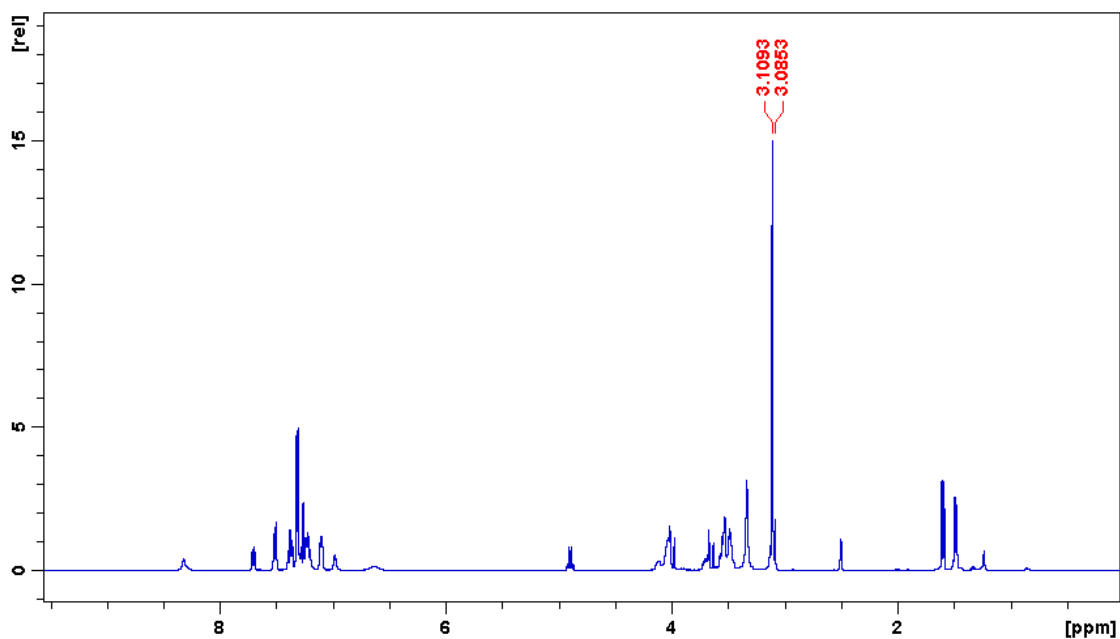

**HRMS** (MALDI-FT ICR) of a sample taken directly from the  $\text{DMSO-d}_6$  reaction mixture:  
 $m/z$  calcd. for  $\text{C}_{23}\text{H}_{35}\text{BN}_2\text{O}_6\text{P}$   $[\text{M}+\text{H}]^+$ : 477,23258; found: 477,23108

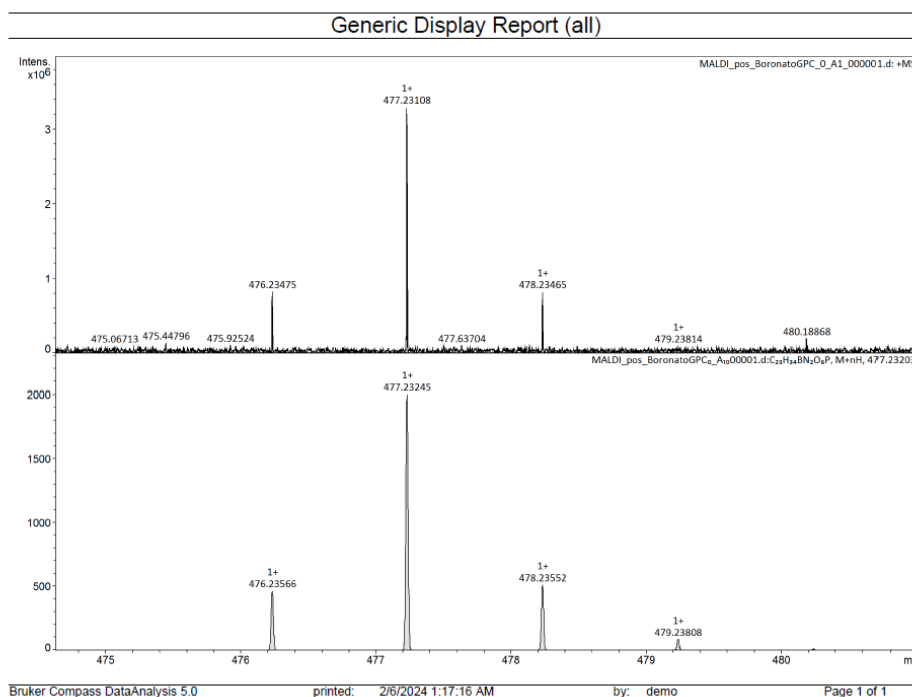

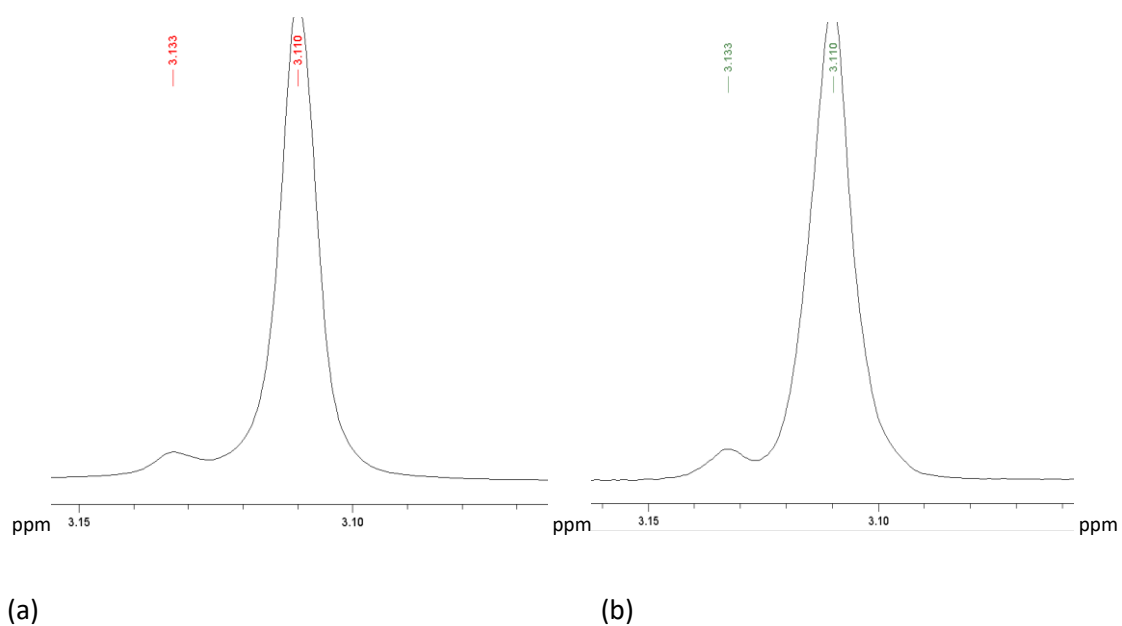

**Figure S1:** Portion of  $^1\text{H}$  NMR resolution enhanced spectra (ppm in abscissa) displaying choline resonance of GPC-boronate product: (a) analysis of commercially available 1,2-dimyristoyl-*sn*-glycero-3-phosphocholine DMPC; (b) analysis of commercially available 1,2-distearoyl-*sn*-glycero-3-phosphocholine DSPC.
